# Supplementary material for: Aquamoleculomics: A Thermodynamic Cornerstone of Systems Biology
Source: Preprints.org preprint supplement (doi:10.20944/preprints202104.0686.v1), 2021-04-26
Supplement: Supplementary file 1 [file supplementary]

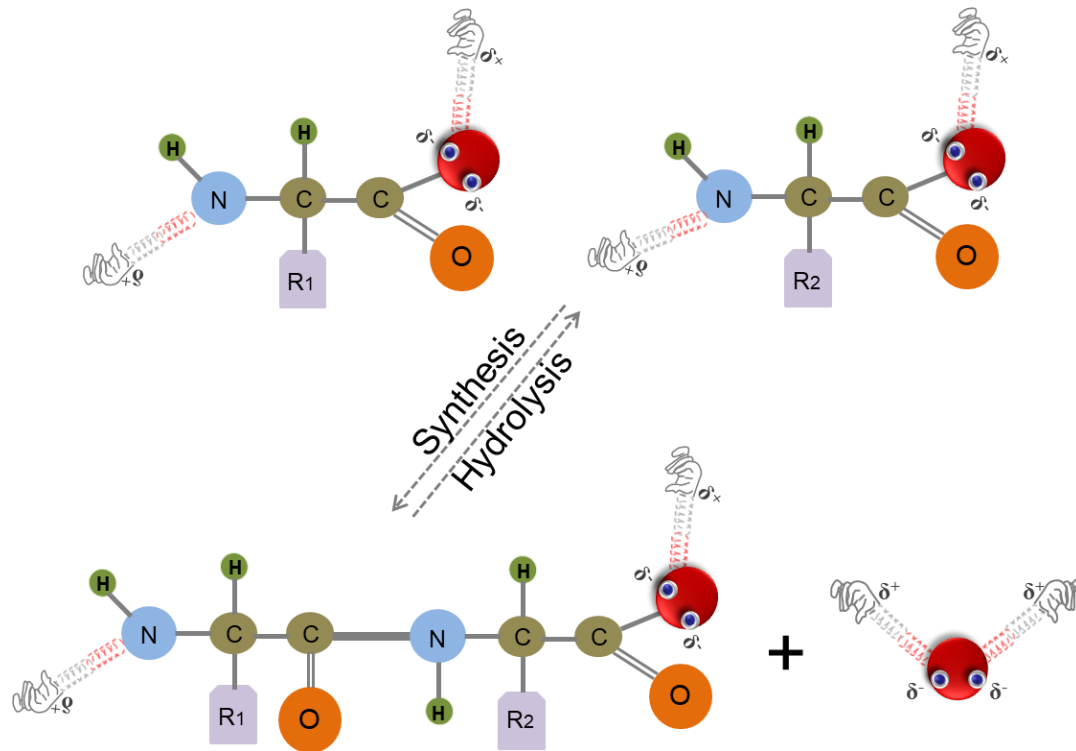

sFig. 1A: The schematic depiction for the production and break of H<sub>2</sub>O molecules in the synthesis and hydrolysis of peptides.

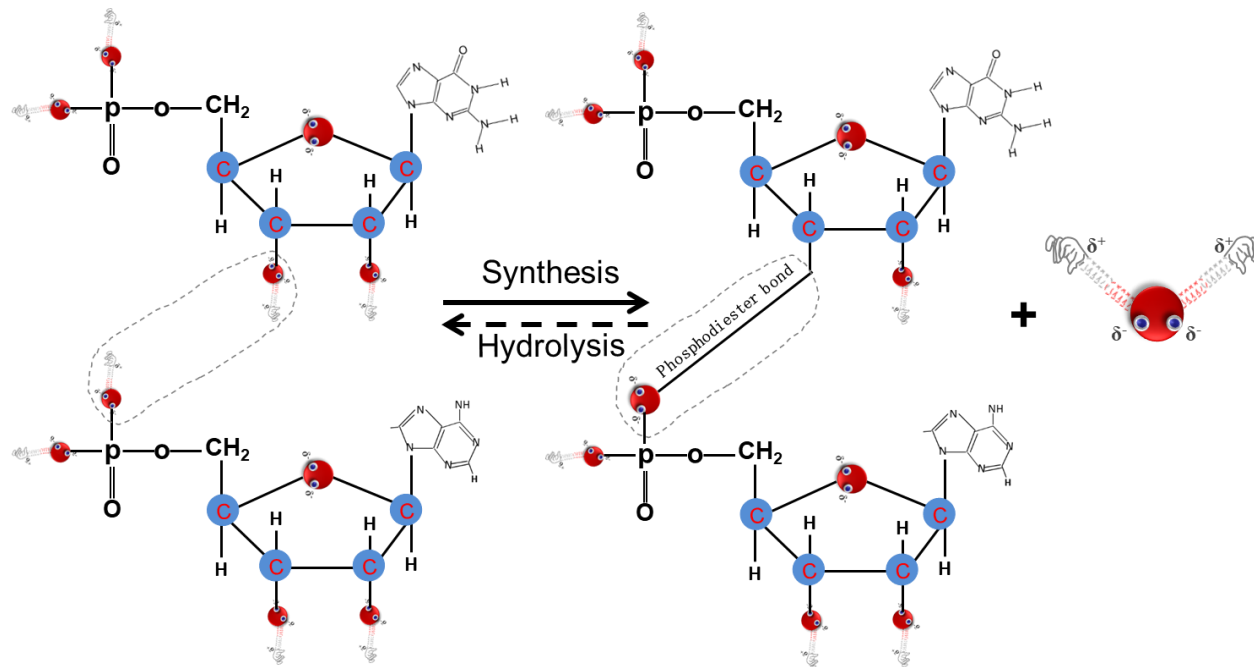

sFig. 1B: The schematic depiction for the production and break of H<sub>2</sub>O molecules in the synthesis and hydrolysis of DNA chain.

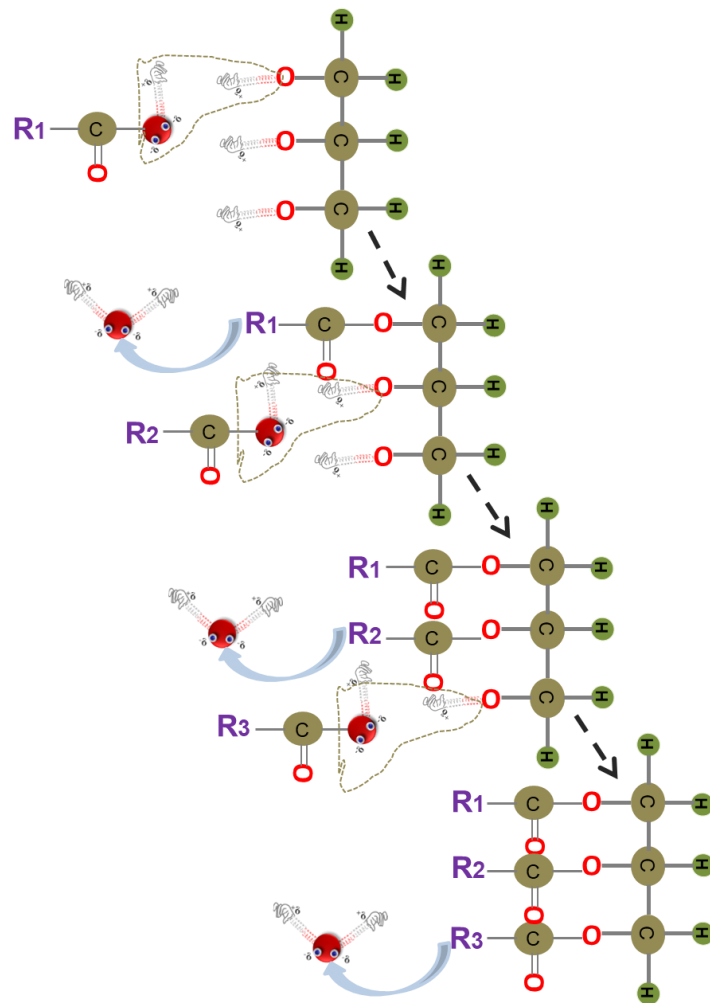

sFig. 1C: The schematic depiction for the production and break of  $\text{H}_2\text{O}$  molecules in the synthesis of glycerin.

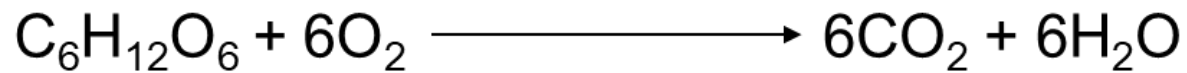

Glucose + Oxygen  $\longrightarrow$  Carbon dioxide + Water

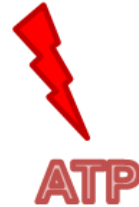

ATP

sFig. 2: The schematic depiction for the production and break of H<sub>2</sub>O molecules in the metabolism of energy.

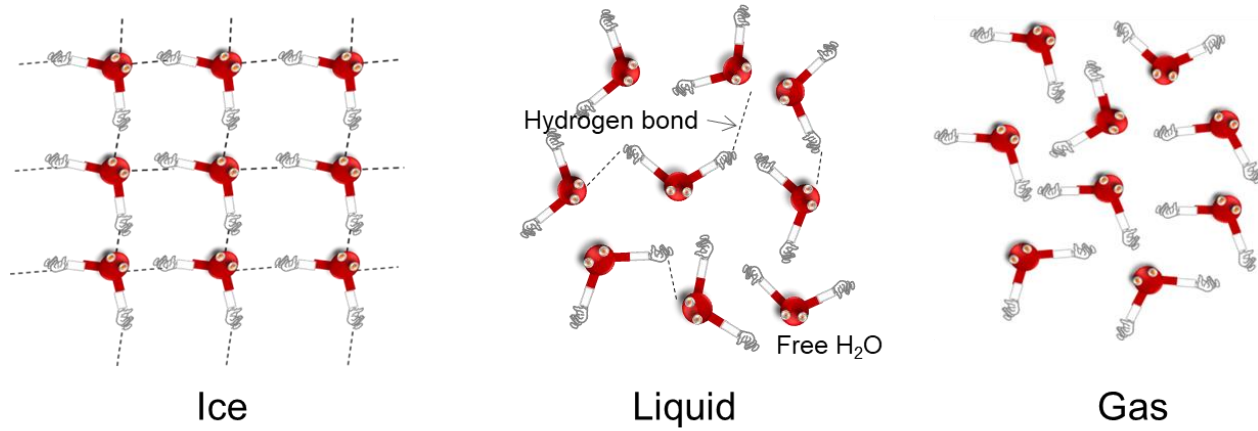

sFig. 3: The schematic depiction for the structures of H<sub>2</sub>O molecules in the phases of ice, liquid and gas.

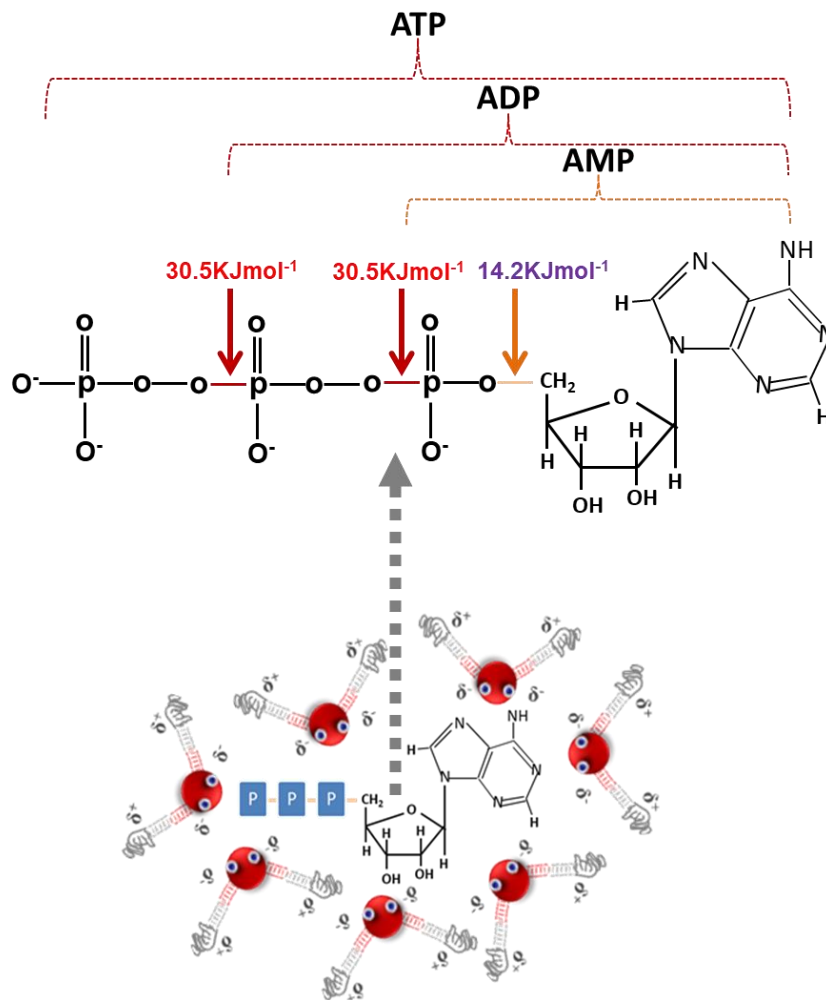

sFig. 4: The schematic depiction for the structures of aqua ATP complex and ATP molecule.

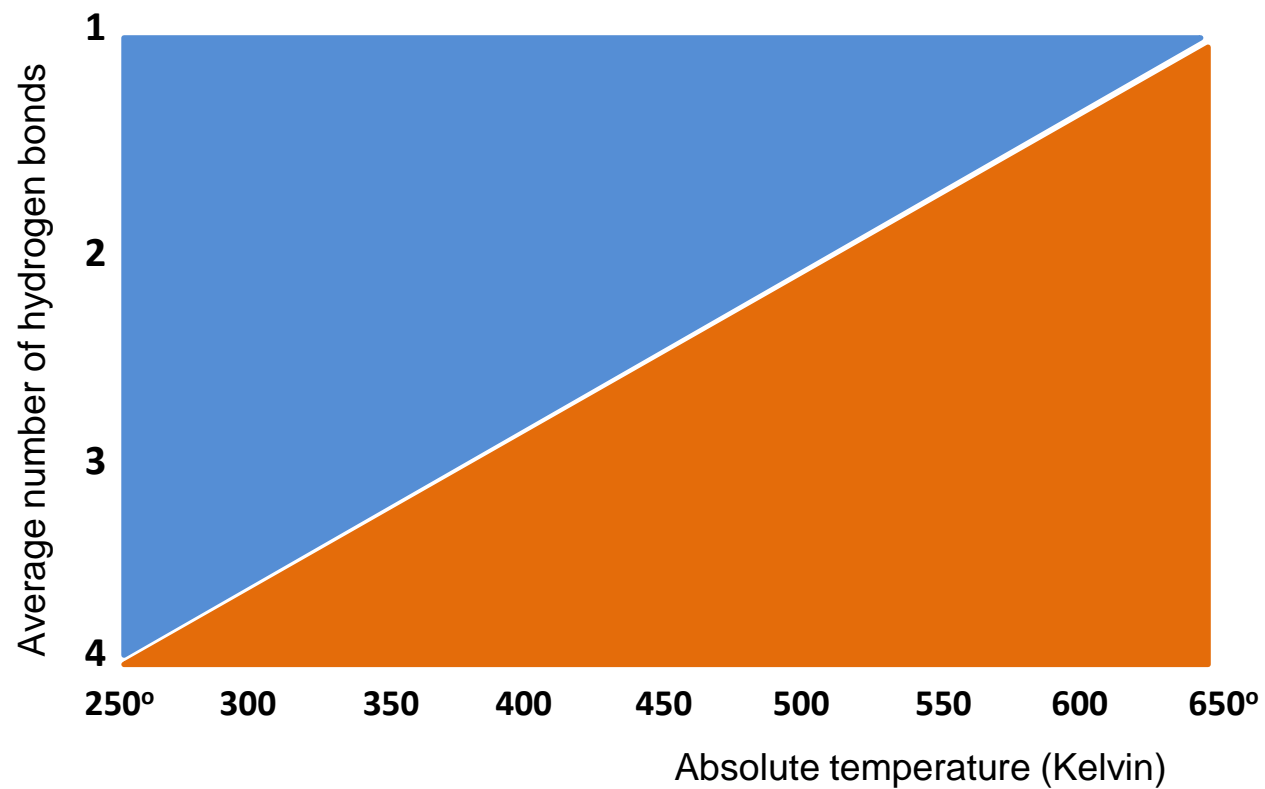

sFig. 5: The relationship between the average number of hydrogen bonds and the temperature in the aqueous solution.

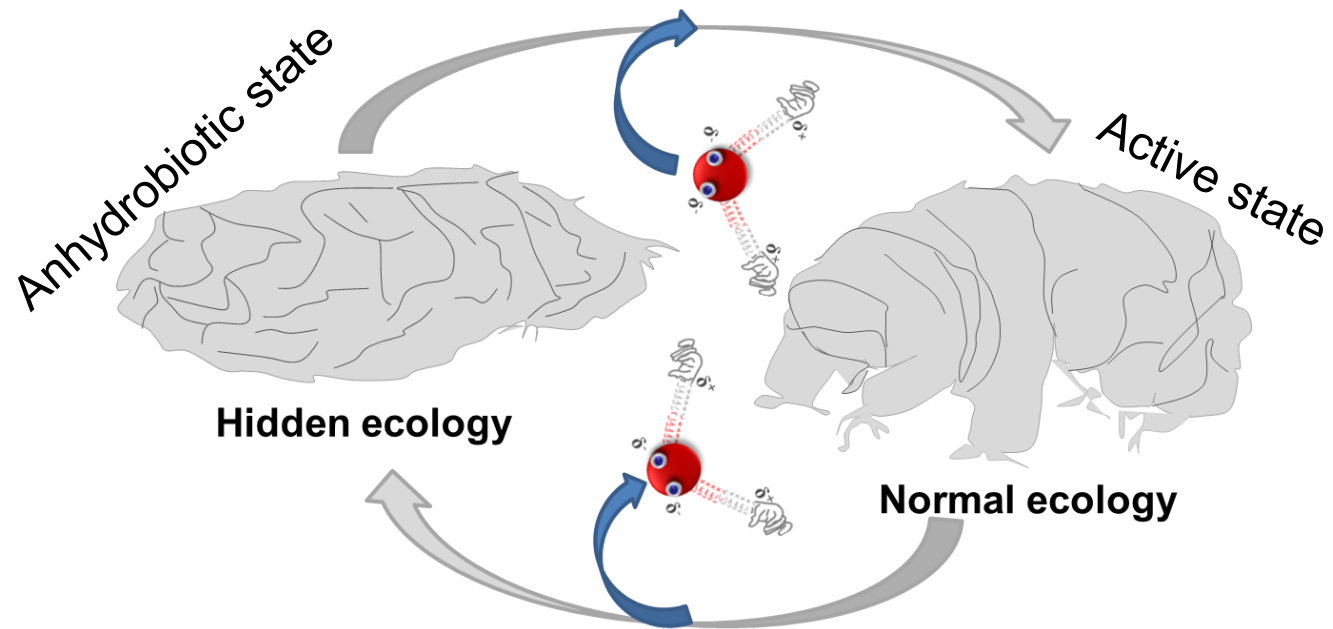

sFig. 6: The schematic depiction for the ecology of Tardigrades in the active and anhydrobiotic states.
